# Supplementary material for: Colonic Biopsies to Assess the Neuropathology of Parkinson's Disease and Its Relationship with Symptoms
Source: PubMed Central journal article supplement (PMC2939055; doi:10.1371/journal.pone.0012728), 2010-09-14

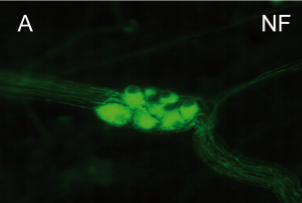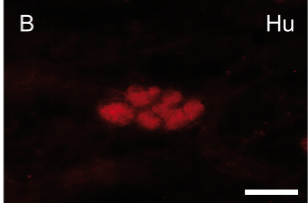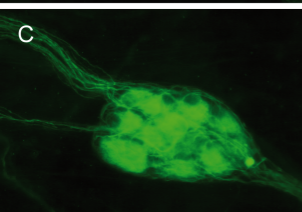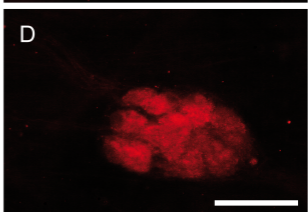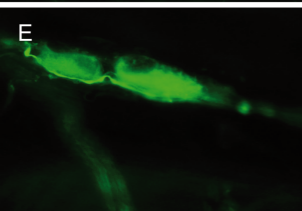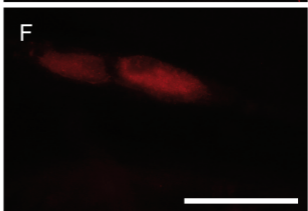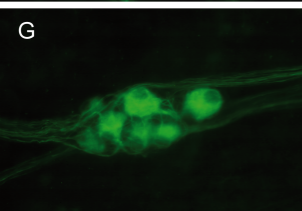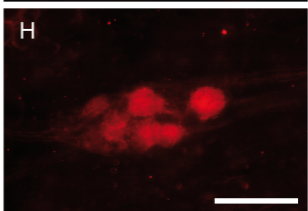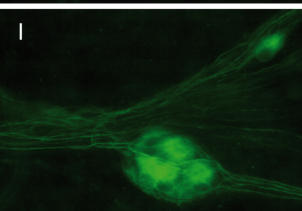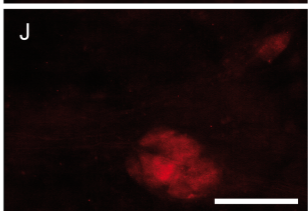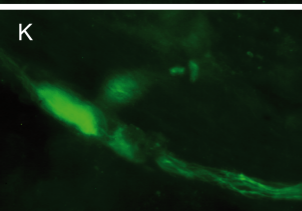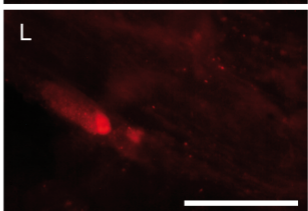

Supplement: pone.0012728.s002.pdf [file pone.0012728.s002.pdf]
